# Supplementary material
Source: PubMed Central journal article supplement (PMC5812754)
Supplement: mmc1.pdf [file mmc1.pdf]

# Obstructive Sleep Apnea and Diabetes

## A State of the Art Review

*Sirimon Reutrakul, MD; and Babak Mokhlesi, MD*

CHEST 2017; 152(5):1070-1086

*Online supplements are not copyedited prior to posting and the author(s) take full responsibility for the accuracy of all data.*

© 2017 AMERICAN COLLEGE OF CHEST PHYSICIANS. Reproduction of this article is prohibited without written permission from the American College of Chest Physicians. See online for more details. DOI: 10.1016/j.chest.2017.05.009

## **e-Appendix 1.**

### **DIABETIC COMPLICATIONS**

It is well known that uncontrolled diabetes is associated with the development of microvascular complications. The presence and severity of OSA may be an additional risk factor for these complications. Intermittent hypoxemia leads to vasoconstriction and increased oxidative stress, resulting in endothelial dysfunction and microvascular impairment.<sup>1</sup> OSA is associated with increased endothelin-1,<sup>2</sup> vascular endothelial growth factor,<sup>3</sup> and alterations in nitric oxide synthase activity.<sup>1</sup> OSA-related also increase inflammatory markers and hypercoagulability likely plays a role.<sup>1,4</sup> Increased advanced glycation end products and alterations in protein kinase C signaling are common pathways by which OSA and hyperglycemia contribute to microvascular complications.<sup>5,6</sup> Lastly, hypertension and alterations in renin-angiotensin-aldosterone regulation partly mediate the relationship between OSA and diabetic kidney disease (DKD).<sup>7</sup>

Studies in patients with type 2 diabetes have explored the association between OSA and microvascular complications. In a meta-analysis of 7 studies, OSA was associated with a higher risk of DKD (pooled OR 1.59, 95% CI: 1.16–2.18).<sup>8</sup> The severity of hypoxemia was found to be related to DKD severity.<sup>9</sup> In addition, a cohort study with a follow up of 2.5 years revealed that patients with type 2 diabetes and OSA had a faster decline in their estimated glomerular filtration rate (eGFR) than those without OSA, with baseline nitrosative stress being an independent predictor of eGFR decline.<sup>10</sup>

In a systematic review of 8 studies, there was no convincing evidence that OSA was associated with diabetic retinopathy.<sup>11</sup> However, some evidence suggests that OSA is associated with greater severity of diabetic retinopathy, with minimum oxygen saturation level during sleep being a predictor.<sup>11-13</sup> Moreover, a recent longitudinal cohort study of patients with type 2 diabetes who were followed for a median of 43 months found an independent association between OSA and the risk of progression to advanced diabetic retinopathy (OR 5.2, 95% CI 1.2-23.0).<sup>14</sup> With regards to diabetic neuropathy, a study of 234 patients in the U.K. found that OSA was independently associated with peripheral neuropathy (OR 2.82, 95% CI 1.44-5.52).<sup>15</sup> A meta-analysis of 880

patients with diabetes found a significant association between OSA and neuropathy (OR 1.95, 95% CI: 1.03–3.70).<sup>16</sup>

Well-designed prospective studies are needed to determine if treatment of OSA can improve or delay the onset the micro and macrovascular complications in patients with type 2 diabetes and OSA.

### **GESTATIONAL DIABETES**

During pregnancy, physical and hormonal changes such as weight gain and mucosal edema could increase susceptibility to developing OSA. AHI and snoring can increase from early to late pregnancy, especially in obese women.<sup>17-19</sup> Indeed, the prevalence of OSA was found to be higher in late pregnancy (2<sup>nd</sup> or 3<sup>rd</sup> trimester) compared to early pregnancy, reflecting new onset OSA in later gestation. In a study of 100 women with uncomplicated pregnancies, the prevalence of OSA (as measured by PSG) was 10.5% and 26.7% in the first and 3<sup>rd</sup> trimester, respectively.<sup>18</sup> A large study in 3,132 nulliparous women found a prevalence of OSA in early (6-15 weeks of gestation) and late (22-31 weeks of gestation) pregnancy to be 3.6% and 8.3%, respectively.<sup>19</sup> However, the nearly three quarters of these women only had mild OSA.<sup>19</sup> The prevalence of OSA during the 3<sup>rd</sup> trimester varies widely from 8.3% to 35%.<sup>19-23</sup> Such variability is likely related to different obstetric populations enrolled in these studies. Predictors of OSA in pregnancy include more advanced age, frequent snoring or snoring volume, obesity, and chronic hypertension.<sup>21,23,24</sup> Unfortunately, questionnaires typically used in non-pregnant population including Berlin Questionnaire and Epworth Sleepiness Scale have a poor performance in predicting OSA during pregnancy with a pooled sensitivity and specificity for Berlin questionnaire of 66% and 62%, and for the Epworth Sleepiness Scael of 44% and 62%, respectively.<sup>25</sup>

Gestational diabetes mellitus (GDM) is a state of abnormal glucose tolerance typically diagnosed during the 2<sup>rd</sup> or 3<sup>rd</sup> trimester, and is associated with adverse maternal and fetal outcomes. Several studies have observed an association between OSA and GDM.<sup>26,27</sup> A meta-analysis of 9,795 participants found that women with symptoms of OSA or a diagnosis of OSA had a 3-fold increased risk of GDM (a pooled BMI-adjusted OR of 3.06).<sup>28</sup> The risk, however, was much

higher in a recent large study which utilized home PSG.<sup>19</sup> In mid-pregnancy, increasing OSA severity was significantly associated with an increasing risk for GDM. Interestingly, the risk was seen at even an AHI of 1-5, which is below the standard threshold of OSA in non-pregnant population (adjusted ORs 4.9, 12.6, and 15.6 for AHI >0 but <5, ≥5 to <15 and ≥15, compared to AHI of 0, respectively).<sup>19</sup> The mechanisms underlying this association are likely similar to those linking OSA to type 2 diabetes in non-pregnant population. The prevalence of OSA in women with GDM has not been studied extensively but has been reported to be between 30-71%.<sup>19,29,30</sup> The large variability is likely due to different characteristics and degree of obesity in the studied populations. There was a suggestion of OSA severity correlating to glycemic control.<sup>30</sup> Thus far no studies have systematically explored the effect of CPAP treatment on glycemic control and pregnancy outcomes in women with GDM and OSA.

In addition to GDM, OSA during pregnancy has been linked to adverse maternal and fetal outcomes, including pre-eclampsia, emergency caesarean-section, premature delivery, low birthweight and admissions of the newborn to the intensive care unit.<sup>31-33</sup> Endothelial dysfunction, increased oxidative stress and sympathetic nervous system overactivity seen in OSA are likely partially responsible for this association.<sup>34</sup> CPAP treatment has been shown to be safe during pregnancy and was associated with a reduction in blood pressure in a small study of women with hypertension and chronic snoring.<sup>35</sup> Whether CPAP will affect pregnancy outcomes in women with OSA remains to be investigated.

In summary, emerging data suggest OSA may be an important risk factor for diabetic complications and may be associated with gestational diabetes. Future studies should explore a causal relationship between OSA and diabetic complications, and the impact of OSA therapy on the development/progression of these complications. Epidemiology of OSA in women with GDM needs to be further studied, including prevalence, risk factors, impact on glycemic control and maternal/fetal outcomes. Sensitive and specific screening tools for OSA in GDM women should be developed. Ultimately, well-designed clinical trials are necessary to demonstrate whether treatment of OSA improves maternofetal outcomes in GDM.

## Reference list

1. Lavie L. Oxidative stress in obstructive sleep apnea and intermittent hypoxia--revisited--the bad ugly and good: implications to the heart and brain. *Sleep Med. Rev.* 2015;20:27-45.
2. Phillips BG, Narkiewicz K, Pesek CA, Haynes WG, Dyken ME, Somers VK. Effects of obstructive sleep apnea on endothelin-1 and blood pressure. *J. Hypertens.* 1999;17(1):61-66.
3. Schulz R, Hummel C, Heinemann S, Seeger W, Grimminger F. Serum levels of vascular endothelial growth factor are elevated in patients with obstructive sleep apnea and severe nighttime hypoxia. *Am. J. Respir. Crit Care Med.* 2002;165(1):67-70.
4. Rangemark C, Hedner JA, Carlson JT, Glerup G, Winther K. Platelet function and fibrinolytic activity in hypertensive and normotensive sleep apnea patients. *Sleep.* 1995;18(3):188-194.
5. Webster BR, Osmond JM, Paredes DA, et al. Phosphoinositide-dependent kinase-1 and protein kinase Cdelta contribute to endothelin-1 constriction and elevated blood pressure in intermittent hypoxia. *J. Pharmacol. Exp. Ther.* 2013;344(1):68-76.
6. Lam JC, Tan KC, Lai AY, Lam DC, Ip MS. Increased serum levels of advanced glycation end-products is associated with severity of sleep disordered breathing but not insulin sensitivity in non-diabetic men with obstructive sleep apnoea. *Sleep Med.* 2012;13(1):15-20.
7. Turek NF, Ricardo AC, Lash JP. Sleep disturbances as nontraditional risk factors for development and progression of CKD: review of the evidence. *Am. J. Kidney Dis.* 2012;60(5):823-833.
8. Leong WB, Jadhakhan F, Taheri S, Thomas GN, Adab P. The Association between Obstructive Sleep Apnea on Diabetic Kidney Disease: A Systematic Review and Meta-Analysis. *Sleep.* 2016;39(2):301-308.
9. Zhang R, Zhang P, Zhao F, Han X, Ji L. Association of Diabetic Microvascular Complications and Parameters of Obstructive Sleep Apnea in Patients with Type 2 Diabetes. *Diabetes Technol. Ther.* 2016;18(7):415-420.
10. Tahrani AA, Ali A, Raymond NT, et al. Obstructive sleep apnea and diabetic nephropathy: a cohort study. *Diabetes Care.* 2013;36(11):3718-3725.
11. Leong WB, Jadhakhan F, Taheri S, Chen YF, Adab P, Thomas GN. Effect of obstructive sleep apnoea on diabetic retinopathy and maculopathy: a systematic review and meta-analysis. *Diabet. Med.* 2016;33(2):158-168.

12. Banerjee D, Leong WB, Arora T, et al. The potential association between obstructive sleep apnea and diabetic retinopathy in severe obesity-the role of hypoxemia. *PLoS. One.* 2013;8(11):e79521.
13. Nishimura A, Kasai T, Tamura H, et al. Relationship between sleep disordered breathing and diabetic retinopathy: Analysis of 136 patients with diabetes. *Diabetes Res. Clin. Pract.* 2015;109(2):306-311.
14. Altaf QA, Dodson P, Ali A, et al. Obstructive Sleep Apnoea and Retinopathy in Patients with Type 2 Diabetes: A Longitudinal Study. *Am J Respir Crit Care Med.* 2017. Jun 8. Epub ahead of Print.
15. Tahrani AA, Ali A, Raymond NT, et al. Obstructive sleep apnea and diabetic neuropathy: a novel association in patients with type 2 diabetes. *Am J Respir. Crit Care Med.* 2012;186(5):434-441.
16. Fujihara K, Kodama S, Horikawa C, et al. The Relationship between Diabetic Neuropathy and Sleep Apnea Syndrome: A Meta-Analysis. *Sleep Disord.* 2013;2013:150371.
17. Maasilta P, Bachour A, Teramo K, Polo O, Laitinen LA. Sleep-related disordered breathing during pregnancy in obese women. *Chest.* 2001;120(5):1448-1454.
18. Pien GW, Pack AI, Jackson N, Maislin G, Macones GA, Schwab RJ. Risk factors for sleep-disordered breathing in pregnancy. *Thorax.* 2014;69(4):371-377.
19. Facco FL, Parker CB, Reddy UM, et al. Association Between Sleep-Disordered Breathing and Hypertensive Disorders of Pregnancy and Gestational Diabetes Mellitus. *Obstet. Gynecol.* 2017;129(1):31-41.
20. Olivarez SA, Maheshwari B, McCarthy M, et al. Prospective trial on obstructive sleep apnea in pregnancy and fetal heart rate monitoring. *Am. J. Obstet. Gynecol.* 2010;202(6):552-557.
21. Wilson DL, Walker SP, Fung AM, O'Donoghue F, Barnes M, Howard M. Can we predict sleep-disordered breathing in pregnancy? The clinical utility of symptoms. *J. Sleep Res.* 2013;22(6):670-678.
22. Antony KM, Agrawal A, Arndt ME, et al. Obstructive sleep apnea in pregnancy: reliability of prevalence and prediction estimates. *J. Perinatol.* 2014;34(8):587-593.
23. Lockhart EM, Ben AA, Tuuli MG, Leighton BL. Obstructive Sleep Apnea in Pregnancy: Assessment of Current Screening Tools. *Obstet. Gynecol.* 2015;126(1):93-102.

24. Facco FL, Ouyang DW, Zee PC, Grobman WA. Development of a pregnancy-specific screening tool for sleep apnea. *J. Clin. Sleep Med.* 2012;8(4):389-394.
25. Tantrakul V, Numthavaj P, Guilleminault C, et al. Performance of screening questionnaires for obstructive sleep apnea during pregnancy: A systematic review and meta-analysis. *Sleep Med Rev.* 2016. DOI 10.1016/j.smrv.2016.11.003
26. Reutrakul S, Zaidi N, Wroblewski K, et al. Sleep disturbances and their relationship to glucose tolerance in pregnancy. *Diabetes Care.* 2011;34(11):2454-2457.
27. Facco FL, Grobman WA, Kramer J, Ho KH, Zee PC. Self-reported short sleep duration and frequent snoring in pregnancy: impact on glucose metabolism. *Am. J. Obstet. Gynecol.* 2010;203(2):142-145.
28. Luque-Fernandez MA, Bain PA, Gelaye B, Redline S, Williams MA. Sleep-disordered breathing and gestational diabetes mellitus: a meta-analysis of 9,795 participants enrolled in epidemiological observational studies. *Diabetes Care.* 2013;36(10):3353-3360.
29. Bisson M, Series F, Giguere Y, et al. Gestational diabetes mellitus and sleep-disordered breathing. *Obstet. Gynecol.* 2014;123(3):634-641.
30. Reutrakul S, Zaidi N, Wroblewski K, et al. Interactions Between Pregnancy, Obstructive Sleep Apnea, and Gestational Diabetes Mellitus. *J Clin. Endocrinol. Metab.* 2013;98(10):4195-4202.
31. O'Brien LM, Bullough AS, Owusu JT, et al. Pregnancy-onset habitual snoring, gestational hypertension, and preeclampsia: prospective cohort study. *Am J Obstet Gynecol.* 2012;207(6):487-489.
32. Bin YS, Cistulli PA, Ford JB. Population-Based Study of Sleep Apnea in Pregnancy and Maternal and Infant Outcomes. *J. Clin. Sleep Med.* 2016;12(6):871-877.
33. Pamidi S, Pinto LM, Marc I, Benedetti A, Schwartzman K, Kimoff RJ. Maternal sleep-disordered breathing and adverse pregnancy outcomes: a systematic review and metaanalysis. *Am J Obstet Gynecol.* 2014;210(1):e1-52-e14.
34. Cain MA, Louis JM. Sleep Disordered Breathing and Adverse Pregnancy Outcomes. *Clin. Lab Med.* 2016;36(2):435-446.
35. Poyares D, Guilleminault C, Hachul H, et al. Pre-eclampsia and nasal CPAP: part 2. Hypertension during pregnancy, chronic snoring, and early nasal CPAP intervention. *Sleep Med.* 2007;9(1):15-21.

**e-Table 1:** Open randomized controlled trials actively recruiting participants with sleep apnea and diabetes found on various clinical trial registries

| <b>Study Principal Investigator and Institution</b>             | <b>Title, Trial Registration Date and Clinicaltrials.gov Identifier</b>                                                                                   | <b>Estimated Number of Participants to be Enrolled</b>                                                      | <b>Study Design</b>                       | <b>Intervention</b>                                                                | <b>Duration</b> | <b>Primary Outcome and Main Secondary Outcomes</b>                                                                                                                                                        |
|-----------------------------------------------------------------|-----------------------------------------------------------------------------------------------------------------------------------------------------------|-------------------------------------------------------------------------------------------------------------|-------------------------------------------|------------------------------------------------------------------------------------|-----------------|-----------------------------------------------------------------------------------------------------------------------------------------------------------------------------------------------------------|
| Eileen R. Chasens<br>University of Pittsburgh<br>Pittsburgh USA | The Effect of Treatment of Obstructive Sleep Apnea on Diabetes Self-Management and Glycemic Control<br>July 2013<br>NCT 01901055                          | 210 adult participants with moderate-to-severe OSA and type 2 diabetes with HbA1c $\geq 6.5\%$              | Randomized cross-over, double blind       | CPAP vs. sham CPAP                                                                 | 3 months        | <u>Primary:</u> HbA1c<br><u>Secondary:</u> Diabetes self-management outcomes                                                                                                                              |
| Naresh M. Punjabi<br>Johns Hopkins University<br>Baltimore, USA | Hyperglycemic Profiles in Obstructive Sleep Apnea: Effects of PAP Therapy<br>January 2015<br>NCT 02454153                                                 | 204 adult participants with OSA and type 2 diabetes                                                         | Randomized, Parallel group, open label    | CPAP plus lifestyle/sleep education vs. lifestyle/sleep education                  | 3 months        | <u>Primary:</u> Glycemic variability assessed by interstitial glucose measured via continuous glucose monitoring system<br><u>Secondary:</u> Endothelial function using EndoPAT device and blood pressure |
| Esben Laugesen<br>Aarhus University<br>Aarhus, Denmark          | Impact of CPAP Treatment on Arterial Stiffness in Patients With Type 2 Diabetes and Newly Diagnosed Obstructive Sleep Apnea<br>March 2015<br>NCT 02482584 | 70 adult participants with moderate-to-severe OSA and type 2 diabetes with HbA1c $\geq 7.0\%$               | Randomized, Parallel group, open-label    | CPAP vs. no CPAP                                                                   | 3 months        | <u>Primary:</u> Change in arterial stiffness measured by carotid-femoral pulse wave velocity<br><u>Secondary:</u> Change in insulin sensitivity by hyperinsulinemic euglycemic clamp                      |
| Daniel Cuthbertson<br>University of Liverpool<br>Liverpool, UK  | ROMANCE: Liraglutide with or without CPAP in type 2 diabetes and OSA<br>August 2015<br>ISRCTN 16250774                                                    | 152 obese adult participants with moderate-to-severe symptomatic OSA and type 2 diabetes with HbA1c $> 7\%$ | Randomized, 4 parallel groups, open-label | 1. Control (no intervention)<br>2. Liraglutide<br>3. CPAP<br>4. Liraglutide & CPAP | 6 months        | <u>Primary:</u> Change in apnea-hypopnea index<br><u>Secondary:</u> Change in HbA1c                                                                                                                       |



|                                                                                  |                                                                                                                                |                                                                                                                                       |                                                         |                                                                                                                 |                                       |                                                                                                                                                                                                                                                              |
|----------------------------------------------------------------------------------|--------------------------------------------------------------------------------------------------------------------------------|---------------------------------------------------------------------------------------------------------------------------------------|---------------------------------------------------------|-----------------------------------------------------------------------------------------------------------------|---------------------------------------|--------------------------------------------------------------------------------------------------------------------------------------------------------------------------------------------------------------------------------------------------------------|
| Jonathan Jun<br>Johns Hopkins<br>University<br>Baltimore, USA                    | Metabolic Impact of<br>Intermittent CPAP<br>March 2016<br>NCT 02824263                                                         | 144 adult<br>participants with<br>moderate-to-severe<br>OSA tolerating home<br>CPAP therapy and<br>with or without type<br>2 diabetes | Randomi<br>zed,<br>cross-<br>over,<br>open-<br>label    | Continuation<br>of CPAP vs.<br>CPAP<br>withdrawal for<br>3 consecutive<br>nights                                | 3 nights<br>of CPAP<br>withdrawa<br>l | <u>Primary:</u> frequent blood<br>sampling during sleep to<br>measure profiles of free<br>fatty acids, glucose, insulin<br>and triglycerides<br><u>Secondary:</u> Endothelial<br>function using EndoPAT<br>device and oral glucose<br>tolerance test         |
| Francisco Garcia-<br>Rio<br>Hospital<br>Universitario La<br>Paz<br>Madrid, Spain | CPAP Effect on<br>Albuminuria in<br>Patients with Diabetic<br>Nephropathy and OSA<br>May 2016<br>NCT 02816762                  | 180 adult<br>participants with<br>untreated OSA and<br>type 2 diabetes with<br>diabetic<br>nephropathy                                | Randomi<br>zed,<br>Parallel<br>group,<br>open-<br>label | CPAP plus<br>conventional<br>pharmacologic<br>al treatment<br>vs.<br>conventional<br>pharmacologic<br>treatment | 12<br>months                          | <u>Primary:</u> Change in<br>albuminuria level<br><u>Secondary:</u> HbA1c, HOMA<br>index                                                                                                                                                                     |
| Francisco Garcia-<br>Rio<br>Hospital<br>Universitario La<br>Paz<br>Madrid, Spain | CPAP Effect on the<br>Progression of Diabetic<br>Retinopathy in<br>Patients with Sleep<br>Apnea<br>August 2016<br>NCT 02874313 | 114 adult<br>participants with<br>untreated OSA and<br>type 2 diabetes with<br>mild non-<br>proliferative diabetic<br>retinopathy     | Randomi<br>zed,<br>Parallel<br>group,<br>open-<br>label | CPAP plus<br>conventional<br>pharmacologic<br>treatment vs.<br>conventional<br>pharmacologic<br>treatment       | 12<br>months                          | <u>Primary:</u> Change in retinal<br>microaneurym or hard<br>exudates<br><u>Secondary:</u> Central macular<br>volume, ganglion cell layer<br>thickness, central fovea<br>thickness, visual acuity,<br>level of diabetic<br>retinopathy, HbA1c, HOMA<br>index |

The following clinical trials registries were accessed on April 20, 2017: ClinicalTrials.gov, International Standard Randomised Controlled Trial Number (ISRCTN: <http://www.isrctn.com/>), Australian New Zealand Clinical Trials Registry (<http://www.anzctr.org.au/>) and the Chinese Clinical Trial Registry (<http://www.chictr.org.cn/>). Our search criteria consisted of "Diabetes" and "Apnea" or "Diabetes" and "Sleep". We only included randomized clinical trials that were actively recruiting participants as of April 20, 2017 and also provided all the information listed in the Table.
